# Supplementary material
Source: Research Square preprint supplement (doi:10.21203/rs.3.rs-9359440/v1)
Supplement: Supplementary file 2 [file 965a31e60943af0c244911da.xlsx]

## Sheet: DisAct_univariate
	protein	AUC	PPV
1	APOC1	0.643875	0.641509
2	APOC4	0.616097	0.613636
3	IGHG2	0.635328	0.62
4	CFHR2	0.627137	0.545455
5	PFN1	0.622863	0.6
6	APOC3	0.611823	0.596154
7	HGFAC	0.632123	0.583333
8	SAA1;SAA2	0.635684	0.596154
9	APOC2	0.626781	0.625
10	KRT2;KRT5;KRT6A;KRT6B	0.634972	0.59375
11	GP1BA	0.677707	0.660377
12	CRP	0.601496	0.590909
13	Sero	0.543803	0.511111

## Sheet: DisAct_multivariate
	protein	AUC	PPV
1	APOC4	0.616097	0.613636
2	PFN1	0.622863	0.6
3	SAA1;SAA2	0.635684	0.596154
4	APOC4:PFN1	0.629986	0.617647
5	APOC4:SAA1;SAA2	0.672365	0.666667
6	PFN1:SAA1;SAA2	0.676638	0.711111
7	APOC4:PFN1:SAA1;SAA2	0.690527	0.658537

## Sheet: Erosion_univariate
	protein	AUC	PPV
1	CA1	0.733666	0.571429
2	AZGP1	0.765426	0.714286
3	BCHE	0.777223	0.684211
4	IGHV2-26	0.778584	0.5
5	CTBS	0.744102	0.571429
6	IGHV5-10-1;IGHV5-51	0.764065	0.733333
7	IGHV1-18	0.83167	0.619048
8	IGHV1-46	0.767241	0.642857
9	IGKV3-11	0.771779	0.733333
10	IGHV3-49	0.738203	0.6
11	SELENOP	0.767695	0.6875
12	ORM1;ORM2	0.754537	0.571429
13	ACTB;ACTG1	0.766788	0.647059
14	MPO	0.763158	0.5625
15	ORM2	0.770417	0.625
16	IGHV3OR16-9	0.761343	0.625
17	LTF	0.767695	0.588235
18	CRP	0.730036	0.5
19	Sero	0.721869	0.5

## Sheet: Erosion_multivariate
	protein	AUC	PPV
1	CA1	0.733666	0.571429
2	IGHV2-26	0.778584	0.5
3	CTBS	0.744102	0.571429
4	IGHV5-10-1;IGHV5-51	0.764065	0.733333
5	IGHV1-18	0.83167	0.619048
6	IGHV1-46	0.767241	0.642857
7	MPO	0.763158	0.5625
8	CA1:IGHV2-26	0.787659	0.631579
9	CA1:CTBS	0.760889	0.5625
10	CA1:IGHV5-10-1;IGHV5-51	0.769056	0.615385
11	CA1:IGHV1-18	0.83167	0.631579
12	CA1:IGHV1-46	0.778584	0.769231
13	CA1:MPO	0.769056	0.625
14	IGHV2-26:CTBS	0.79265	0.666667
15	IGHV2-26:IGHV5-10-1;IGHV5-51	0.785844	0.5
16	IGHV2-26:IGHV1-18	0.833031	0.666667
17	IGHV2-26:IGHV1-46	0.800817	0.529412
18	IGHV2-26:MPO	0.818966	0.65
19	CTBS:IGHV5-10-1;IGHV5-51	0.780853	0.684211
20	CTBS:IGHV1-18	0.846189	0.681818
21	CTBS:IGHV1-46	0.788113	0.733333
22	CTBS:MPO	0.779038	0.588235
23	IGHV5-10-1;IGHV5-51:IGHV1-18	0.83167	0.619048
24	IGHV5-10-1;IGHV5-51:IGHV1-46	0.784029	0.666667
25	IGHV5-10-1;IGHV5-51:MPO	0.821234	0.647059
26	IGHV1-18:IGHV1-46	0.830762	0.619048
27	IGHV1-18:MPO	0.846642	0.619048
28	IGHV1-46:MPO	0.804446	0.6875
29	CA1:IGHV2-26:CTBS	0.811706	0.6
30	CA1:IGHV2-26:IGHV5-10-1;IGHV5-51	0.793557	0.611111
31	CA1:IGHV2-26:IGHV1-18	0.833938	0.684211
32	CA1:IGHV2-26:IGHV1-46	0.811252	0.666667
33	CA1:IGHV2-26:MPO	0.825318	0.636364
34	CA1:CTBS:IGHV5-10-1;IGHV5-51	0.791289	0.588235
35	CA1:CTBS:IGHV1-18	0.846642	0.714286
36	CA1:CTBS:IGHV1-46	0.79265	0.8
37	CA1:CTBS:MPO	0.788113	0.611111
38	CA1:IGHV5-10-1;IGHV5-51:IGHV1-18	0.834392	0.631579
39	CA1:IGHV5-10-1;IGHV5-51:IGHV1-46	0.788113	0.75
40	CA1:IGHV5-10-1;IGHV5-51:MPO	0.829855	0.588235
41	CA1:IGHV1-18:IGHV1-46	0.831216	0.611111
42	CA1:IGHV1-18:MPO	0.846642	0.65
43	CA1:IGHV1-46:MPO	0.807169	0.75
44	IGHV2-26:CTBS:IGHV5-10-1;IGHV5-51	0.796733	0.705882
45	IGHV2-26:CTBS:IGHV1-18	0.847096	0.727273
46	IGHV2-26:CTBS:IGHV1-46	0.815336	0.578947
47	IGHV2-26:CTBS:MPO	0.826679	0.681818
48	IGHV2-26:IGHV5-10-1;IGHV5-51:IGHV1-18	0.832123	0.666667
49	IGHV2-26:IGHV5-10-1;IGHV5-51:IGHV1-46	0.799456	0.5625
50	IGHV2-26:IGHV5-10-1;IGHV5-51:MPO	0.835753	0.65
51	IGHV2-26:IGHV1-18:IGHV1-46	0.833031	0.666667
52	IGHV2-26:IGHV1-18:MPO	0.84755	0.636364
53	IGHV2-26:IGHV1-46:MPO	0.835299	0.7
54	CTBS:IGHV5-10-1;IGHV5-51:IGHV1-18	0.846189	0.681818
55	CTBS:IGHV5-10-1;IGHV5-51:IGHV1-46	0.800817	0.75
56	CTBS:IGHV5-10-1;IGHV5-51:MPO	0.831216	0.647059
57	CTBS:IGHV1-18:IGHV1-46	0.84392	0.714286
58	CTBS:IGHV1-18:MPO	0.852995	0.833333
59	CTBS:IGHV1-46:MPO	0.809891	0.705882
60	IGHV5-10-1;IGHV5-51:IGHV1-18:IGHV1-46	0.830309	0.619048
61	IGHV5-10-1;IGHV5-51:IGHV1-18:MPO	0.85118	0.722222
62	IGHV5-10-1;IGHV5-51:IGHV1-46:MPO	0.825771	0.722222
63	IGHV1-18:IGHV1-46:MPO	0.847096	0.619048
