# Supplementary material
Source: Research Square preprint supplement (doi:10.21203/rs.3.rs-9359440/v1)
Supplement: Supplementary file 3 [file dc1b99dbb428eb9961868b4f.xlsx]

## Sheet: DA_delong_df
protein	Ref	delong.p	delong.Z	auc.m1	auc.ref
APOC4	CRP	0.794229	0.260824	0.616097	0.601496
APOC4	Sero	0.157972	1.41193	0.616097	0.543803
PFN1	CRP	0.636045	0.473236	0.622863	0.601496
PFN1	Sero	0.040532	2.04829	0.622863	0.543803
SAA1;SAA2	CRP	0.417179	0.811325	0.635684	0.601496
SAA1;SAA2	Sero	0.110867	1.59431	0.635684	0.543803
PFN1+SAA1;SAA2	CRP	0.128151	1.52144	0.676638	0.601496
PFN1+SAA1;SAA2	Sero	0.0319325	2.14525	0.676638	0.543803
APOC4+SAA1;SAA2	CRP	0.169666	1.37328	0.672365	0.601496
APOC4+SAA1;SAA2	Sero	0.0395363	2.05856	0.672365	0.543803
APOC4+PFN1+SAA1;SAA2	CRP	0.0934338	1.67756	0.690527	0.601496
APOC4+PFN1+SAA1;SAA2	Sero	0.0206602	2.31414	0.690527	0.543803
PFN1+SAA1;SAA2	APOC4	0.337151	-0.95981	0.616097	0.676638
PFN1+SAA1;SAA2	PFN1	0.303295	-1.02939	0.622863	0.676638
PFN1+SAA1;SAA2	SAA1;SAA2	0.194697	-1.29681	0.635684	0.676638
APOC4+SAA1;SAA2	APOC4	0.17087	-1.36941	0.616097	0.672365
APOC4+SAA1;SAA2	PFN1	0.441573	-0.76954	0.622863	0.672365
APOC4+SAA1;SAA2	SAA1;SAA2	0.287378	-1.06389	0.635684	0.672365
APOC4+PFN1+SAA1;SAA2	APOC4	0.115378	-1.57447	0.616097	0.690527
APOC4+PFN1+SAA1;SAA2	PFN1	0.221748	-1.22189	0.622863	0.690527
APOC4+PFN1+SAA1;SAA2	SAA1;SAA2	0.162257	-1.39752	0.635684	0.690527

## Sheet: Ero_delong_df
protein	Ref	delong.p	delong.Z	auc.m1	auc.ref
CA1	CRP	0.891573	0.136314	0.733666	0.730036
CA1	Sero	0.624211	0.489891	0.733666	0.721869
IGHV2-26	CRP	0.204797	1.268	0.778584	0.730036
IGHV2-26	Sero	0.131587	1.50787	0.778584	0.721869
CTBS	CRP	0.616629	0.500634	0.744102	0.730036
CTBS	Sero	0.430731	0.787942	0.744102	0.721869
IGHV5-10-1;IGHV5-51	CRP	0.298959	1.03867	0.764065	0.730036
IGHV5-10-1;IGHV5-51	Sero	0.183135	1.33116	0.764065	0.721869
IGHV1-18	CRP	0.015098	2.43002	0.83167	0.730036
IGHV1-18	Sero	0.00940762	2.59687	0.83167	0.721869
IGHV1-46	CRP	0.287636	1.06332	0.767241	0.730036
IGHV1-46	Sero	0.205211	1.26685	0.767241	0.721869
MPO	CRP	0.356235	0.922563	0.763158	0.730036
MPO	Sero	0.221884	1.22153	0.763158	0.721869
IGHV1-18+MPO	CRP	0.00775941	2.66236	0.846642	0.730036
IGHV1-18+MPO	Sero	0.00488327	2.81463	0.846642	0.721869
CTBS+IGHV1-18	CRP	0.00604928	2.7451	0.846189	0.730036
CTBS+IGHV1-18	Sero	0.00445485	2.84402	0.846189	0.721869
IGHV5-10-1;IGHV5-51+MPO	CRP	0.0352298	2.10571	0.821234	0.730036
IGHV5-10-1;IGHV5-51+MPO	Sero	0.0202148	2.32234	0.821234	0.721869
IGHV2-26+MPO	CRP	0.0444001	2.01029	0.818966	0.730036
IGHV2-26+MPO	Sero	0.0251239	2.23949	0.818966	0.721869
IGHV1-46+MPO	CRP	0.0692623	1.8167	0.804446	0.730036
IGHV1-46+MPO	Sero	0.0480007	1.97736	0.804446	0.721869
IGHV2-26+IGHV1-46	CRP	0.0844321	1.72553	0.800817	0.730036
IGHV2-26+IGHV1-46	Sero	0.0573431	1.90069	0.800817	0.721869
IGHV2-26+CTBS	CRP	0.12577	1.531	0.79265	0.730036
IGHV2-26+CTBS	Sero	0.0864799	1.71427	0.79265	0.721869
CTBS+IGHV1-46	CRP	0.113447	1.58289	0.788113	0.730036
CTBS+IGHV1-46	Sero	0.0831604	1.73264	0.788113	0.721869
IGHV5-10-1;IGHV5-51+IGHV1-46	CRP	0.129508	1.51605	0.784029	0.730036
IGHV5-10-1;IGHV5-51+IGHV1-46	Sero	0.0840135	1.72786	0.784029	0.721869
CTBS+IGHV5-10-1;IGHV5-51	CRP	0.14381	1.46175	0.780853	0.730036
CTBS+IGHV5-10-1;IGHV5-51	Sero	0.10515	1.62039	0.780853	0.721869
CTBS+MPO	CRP	0.221199	1.22335	0.779038	0.730036
CTBS+MPO	Sero	0.140598	1.47357	0.779038	0.721869
CA1+IGHV1-46	CRP	0.18387	1.32893	0.778584	0.730036
CA1+IGHV1-46	Sero	0.124853	1.53472	0.778584	0.721869
CA1+CTBS	CRP	0.375107	0.886949	0.760889	0.730036
CA1+CTBS	Sero	0.247988	1.15525	0.760889	0.721869
IGHV2-26+IGHV5-10-1;IGHV5-51+MPO	CRP	0.0156375	2.41727	0.835753	0.730036
IGHV2-26+IGHV5-10-1;IGHV5-51+MPO	Sero	0.00860937	2.62719	0.835753	0.721869
IGHV2-26+IGHV1-46+MPO	CRP	0.0184161	2.35714	0.835299	0.730036
IGHV2-26+IGHV1-46+MPO	Sero	0.0118888	2.51543	0.835299	0.721869
IGHV2-26+CTBS+IGHV1-46	CRP	0.0353737	2.10405	0.815336	0.730036
IGHV2-26+CTBS+IGHV1-46	Sero	0.0252571	2.23745	0.815336	0.721869
CA1+IGHV2-26+CTBS	CRP	0.0495436	1.96388	0.811706	0.730036
CA1+IGHV2-26+CTBS	Sero	0.0292946	2.1795	0.811706	0.721869
CA1+IGHV2-26+IGHV1-46	CRP	0.0535144	1.93075	0.811252	0.730036
CA1+IGHV2-26+IGHV1-46	Sero	0.0322423	2.14139	0.811252	0.721869
CTBS+IGHV5-10-1;IGHV5-51+IGHV1-46	CRP	0.04987	1.96108	0.800817	0.730036
CTBS+IGHV5-10-1;IGHV5-51+IGHV1-46	Sero	0.038328	2.07133	0.800817	0.721869
CA1+CTBS+IGHV5-10-1;IGHV5-51	CRP	0.104241	1.62463	0.791289	0.730036
CA1+CTBS+IGHV5-10-1;IGHV5-51	Sero	0.0693088	1.8164	0.791289	0.721869
IGHV1-18+MPO	CA1	0.0152913	2.4254	0.846642	0.733666
IGHV1-18+MPO	IGHV2-26	0.0785377	1.75923	0.846642	0.778584
IGHV1-18+MPO	CTBS	0.0256146	2.23201	0.846642	0.744102
IGHV1-18+MPO	IGHV5-10-1;IGHV5-51	0.0471712	1.98476	0.846642	0.764065
IGHV1-18+MPO	IGHV1-18	0.466496	0.728192	0.846642	0.83167
IGHV1-18+MPO	IGHV1-46	0.0343858	2.11552	0.846642	0.767241
IGHV1-18+MPO	MPO	0.0303458	2.16555	0.846642	0.763158
CTBS+IGHV1-18	CA1	0.0180691	2.3642	0.846189	0.733666
CTBS+IGHV1-18	IGHV2-26	0.0511428	1.95028	0.846189	0.778584
CTBS+IGHV1-18	CTBS	0.0108306	2.54812	0.846189	0.744102
CTBS+IGHV1-18	IGHV5-10-1;IGHV5-51	0.0244594	2.24984	0.846189	0.764065
CTBS+IGHV1-18	IGHV1-18	0.255229	1.13774	0.846189	0.83167
CTBS+IGHV1-18	IGHV1-46	0.0259144	2.22749	0.846189	0.767241
CTBS+IGHV1-18	MPO	0.0981778	1.65375	0.846189	0.763158
IGHV5-10-1;IGHV5-51+MPO	CA1	0.0612182	1.87192	0.821234	0.733666
IGHV5-10-1;IGHV5-51+MPO	IGHV2-26	0.333455	0.967179	0.821234	0.778584
IGHV5-10-1;IGHV5-51+MPO	CTBS	0.0778761	1.76314	0.821234	0.744102
IGHV5-10-1;IGHV5-51+MPO	IGHV5-10-1;IGHV5-51	0.120133	1.55422	0.821234	0.764065
IGHV5-10-1;IGHV5-51+MPO	IGHV1-18	0.789539	-0.26691	0.821234	0.83167
IGHV5-10-1;IGHV5-51+MPO	IGHV1-46	0.187438	1.3182	0.821234	0.767241
IGHV5-10-1;IGHV5-51+MPO	MPO	0.0669972	1.83169	0.821234	0.763158
IGHV2-26+MPO	CA1	0.0672427	1.83005	0.818966	0.733666
IGHV2-26+MPO	IGHV2-26	0.160946	1.4019	0.818966	0.778584
IGHV2-26+MPO	CTBS	0.101972	1.63537	0.818966	0.744102
IGHV2-26+MPO	IGHV5-10-1;IGHV5-51	0.225358	1.2124	0.818966	0.764065
IGHV2-26+MPO	IGHV1-18	0.742545	-0.328485	0.818966	0.83167
IGHV2-26+MPO	IGHV1-46	0.234156	1.18972	0.818966	0.767241
IGHV2-26+MPO	MPO	0.102195	1.63431	0.818966	0.763158
IGHV1-46+MPO	CA1	0.147123	1.44977	0.804446	0.733666
IGHV1-46+MPO	IGHV2-26	0.577083	0.557651	0.804446	0.778584
IGHV1-46+MPO	CTBS	0.176421	1.35186	0.804446	0.744102
IGHV1-46+MPO	IGHV5-10-1;IGHV5-51	0.387462	0.86423	0.804446	0.764065
IGHV1-46+MPO	IGHV1-18	0.493117	-0.68536	0.804446	0.83167
IGHV1-46+MPO	IGHV1-46	0.178578	1.34515	0.804446	0.767241
IGHV1-46+MPO	MPO	0.176963	1.35016	0.804446	0.763158
IGHV2-26+IGHV1-46	CA1	0.152689	1.4301	0.800817	0.733666
IGHV2-26+IGHV1-46	IGHV2-26	0.270174	1.10266	0.800817	0.778584
IGHV2-26+IGHV1-46	CTBS	0.199862	1.28195	0.800817	0.744102
IGHV2-26+IGHV1-46	IGHV5-10-1;IGHV5-51	0.284055	1.07125	0.800817	0.764065
IGHV2-26+IGHV1-46	IGHV1-18	0.256419	-1.1349	0.800817	0.83167
IGHV2-26+IGHV1-46	IGHV1-46	0.218655	1.23011	0.800817	0.767241
IGHV2-26+IGHV1-46	MPO	0.472499	0.71842	0.800817	0.763158
IGHV2-26+CTBS	CA1	0.209264	1.25559	0.79265	0.733666
IGHV2-26+CTBS	IGHV2-26	0.435478	0.779852	0.79265	0.778584
IGHV2-26+CTBS	CTBS	0.153133	1.42855	0.79265	0.744102
IGHV2-26+CTBS	IGHV5-10-1;IGHV5-51	0.454689	0.747621	0.79265	0.764065
IGHV2-26+CTBS	IGHV1-18	0.287337	-1.06398	0.79265	0.83167
IGHV2-26+CTBS	IGHV1-46	0.554021	0.591745	0.79265	0.767241
IGHV2-26+CTBS	MPO	0.562511	0.579116	0.79265	0.763158
CTBS+IGHV1-46	CA1	0.248742	1.15341	0.788113	0.733666
CTBS+IGHV1-46	IGHV2-26	0.812554	0.237133	0.788113	0.778584
CTBS+IGHV1-46	CTBS	0.168103	1.37833	0.788113	0.744102
CTBS+IGHV1-46	IGHV5-10-1;IGHV5-51	0.512551	0.654871	0.788113	0.764065
CTBS+IGHV1-46	IGHV1-18	0.211501	-1.24945	0.788113	0.83167
CTBS+IGHV1-46	IGHV1-46	0.28052	1.07915	0.788113	0.767241
CTBS+IGHV1-46	MPO	0.588399	0.541157	0.788113	0.763158
IGHV5-10-1;IGHV5-51+IGHV1-46	CA1	0.242962	1.16761	0.784029	0.733666
IGHV5-10-1;IGHV5-51+IGHV1-46	IGHV2-26	0.880558	0.150262	0.784029	0.778584
IGHV5-10-1;IGHV5-51+IGHV1-46	CTBS	0.333458	0.967171	0.784029	0.744102
IGHV5-10-1;IGHV5-51+IGHV1-46	IGHV5-10-1;IGHV5-51	0.35619	0.922649	0.784029	0.764065
IGHV5-10-1;IGHV5-51+IGHV1-46	IGHV1-18	0.105185	-1.62022	0.784029	0.83167
IGHV5-10-1;IGHV5-51+IGHV1-46	IGHV1-46	0.334795	0.9645	0.784029	0.767241
IGHV5-10-1;IGHV5-51+IGHV1-46	MPO	0.675962	0.41798	0.784029	0.763158
CTBS+IGHV5-10-1;IGHV5-51	CA1	0.257536	1.13223	0.780853	0.733666
CTBS+IGHV5-10-1;IGHV5-51	IGHV2-26	0.952025	0.0601638	0.780853	0.778584
CTBS+IGHV5-10-1;IGHV5-51	CTBS	0.150956	1.43616	0.780853	0.744102
CTBS+IGHV5-10-1;IGHV5-51	IGHV5-10-1;IGHV5-51	0.449524	0.756209	0.780853	0.764065
CTBS+IGHV5-10-1;IGHV5-51	IGHV1-18	0.194092	-1.29857	0.780853	0.83167
CTBS+IGHV5-10-1;IGHV5-51	IGHV1-46	0.727787	0.348071	0.780853	0.767241
CTBS+IGHV5-10-1;IGHV5-51	MPO	0.724606	0.352309	0.780853	0.763158
CTBS+MPO	CA1	0.325166	0.983897	0.779038	0.733666
CTBS+MPO	IGHV2-26	0.992759	0.00907577	0.779038	0.778584
CTBS+MPO	CTBS	0.252574	1.14412	0.779038	0.744102
CTBS+MPO	IGHV5-10-1;IGHV5-51	0.756794	0.309693	0.779038	0.764065
CTBS+MPO	IGHV1-18	0.28346	-1.07258	0.779038	0.83167
CTBS+MPO	IGHV1-46	0.799366	0.254168	0.779038	0.767241
CTBS+MPO	MPO	0.511538	0.656445	0.779038	0.763158
CA1+IGHV1-46	CA1	0.195446	1.29464	0.778584	0.733666
CA1+IGHV1-46	IGHV2-26	1	0	0.778584	0.778584
CA1+IGHV1-46	CTBS	0.444233	0.765065	0.778584	0.744102
CA1+IGHV1-46	IGHV5-10-1;IGHV5-51	0.68284	0.40859	0.778584	0.764065
CA1+IGHV1-46	IGHV1-18	0.10479	-1.62206	0.778584	0.83167
CA1+IGHV1-46	IGHV1-46	0.586988	0.543206	0.778584	0.767241
CA1+IGHV1-46	MPO	0.739875	0.332019	0.778584	0.763158
CA1+CTBS	CA1	0.333068	0.967953	0.760889	0.733666
CA1+CTBS	IGHV2-26	0.688102	-0.401433	0.760889	0.778584
CA1+CTBS	CTBS	0.473943	0.716078	0.760889	0.744102
CA1+CTBS	IGHV5-10-1;IGHV5-51	0.934812	-0.0817923	0.760889	0.764065
CA1+CTBS	IGHV1-18	0.125554	-1.53187	0.760889	0.83167
CA1+CTBS	IGHV1-46	0.893058	-0.134436	0.760889	0.767241
CA1+CTBS	MPO	0.958479	-0.052062	0.760889	0.763158
IGHV2-26+IGHV5-10-1;IGHV5-51+MPO	CA1	0.0255319	2.23326	0.835753	0.733666
IGHV2-26+IGHV5-10-1;IGHV5-51+MPO	IGHV2-26	0.0726904	1.79477	0.835753	0.778584
IGHV2-26+IGHV5-10-1;IGHV5-51+MPO	CTBS	0.0385596	2.06886	0.835753	0.744102
IGHV2-26+IGHV5-10-1;IGHV5-51+MPO	IGHV5-10-1;IGHV5-51	0.0604177	1.87773	0.835753	0.764065
IGHV2-26+IGHV5-10-1;IGHV5-51+MPO	IGHV1-18	0.90455	0.119915	0.835753	0.83167
IGHV2-26+IGHV5-10-1;IGHV5-51+MPO	IGHV1-46	0.0964319	1.6624	0.835753	0.767241
IGHV2-26+IGHV5-10-1;IGHV5-51+MPO	MPO	0.0396186	2.0577	0.835753	0.763158
IGHV2-26+IGHV1-46+MPO	CA1	0.0417342	2.03616	0.835299	0.733666
IGHV2-26+IGHV1-46+MPO	IGHV2-26	0.0711022	1.80482	0.835299	0.778584
IGHV2-26+IGHV1-46+MPO	CTBS	0.0470085	1.98622	0.835299	0.744102
IGHV2-26+IGHV1-46+MPO	IGHV5-10-1;IGHV5-51	0.104152	1.62505	0.835299	0.764065
IGHV2-26+IGHV1-46+MPO	IGHV1-18	0.915218	0.106459	0.835299	0.83167
IGHV2-26+IGHV1-46+MPO	IGHV1-46	0.0460316	1.9951	0.835299	0.767241
IGHV2-26+IGHV1-46+MPO	MPO	0.0554935	1.91499	0.835299	0.763158
IGHV2-26+CTBS+IGHV1-46	CA1	0.0916559	1.68673	0.815336	0.733666
IGHV2-26+CTBS+IGHV1-46	IGHV2-26	0.131317	1.50893	0.815336	0.778584
IGHV2-26+CTBS+IGHV1-46	CTBS	0.0519578	1.94348	0.815336	0.744102
IGHV2-26+CTBS+IGHV1-46	IGHV5-10-1;IGHV5-51	0.155547	1.42021	0.815336	0.764065
IGHV2-26+CTBS+IGHV1-46	IGHV1-18	0.583071	-0.548905	0.815336	0.83167
IGHV2-26+CTBS+IGHV1-46	IGHV1-46	0.108141	1.60661	0.815336	0.767241
IGHV2-26+CTBS+IGHV1-46	MPO	0.300296	1.0358	0.815336	0.763158
CA1+IGHV2-26+CTBS	CA1	0.0371415	2.0842	0.811706	0.733666
CA1+IGHV2-26+CTBS	IGHV2-26	0.202223	1.27524	0.811706	0.778584
CA1+IGHV2-26+CTBS	CTBS	0.0552252	1.9171	0.811706	0.744102
CA1+IGHV2-26+CTBS	IGHV5-10-1;IGHV5-51	0.198111	1.28695	0.811706	0.764065
CA1+IGHV2-26+CTBS	IGHV1-18	0.591922	-0.536053	0.811706	0.83167
CA1+IGHV2-26+CTBS	IGHV1-46	0.321078	0.992244	0.811706	0.767241
CA1+IGHV2-26+CTBS	MPO	0.326727	0.980727	0.811706	0.763158
CA1+IGHV2-26+IGHV1-46	CA1	0.042467	2.02891	0.811252	0.733666
CA1+IGHV2-26+IGHV1-46	IGHV2-26	0.199352	1.2834	0.811252	0.778584
CA1+IGHV2-26+IGHV1-46	CTBS	0.142879	1.46516	0.811252	0.744102
CA1+IGHV2-26+IGHV1-46	IGHV5-10-1;IGHV5-51	0.167895	1.379	0.811252	0.764065
CA1+IGHV2-26+IGHV1-46	IGHV1-18	0.486649	-0.695649	0.811252	0.83167
CA1+IGHV2-26+IGHV1-46	IGHV1-46	0.178644	1.34494	0.811252	0.767241
CA1+IGHV2-26+IGHV1-46	MPO	0.347862	0.938744	0.811252	0.763158
CTBS+IGHV5-10-1;IGHV5-51+IGHV1-46	CA1	0.141252	1.47115	0.800817	0.733666
CTBS+IGHV5-10-1;IGHV5-51+IGHV1-46	IGHV2-26	0.548668	0.599757	0.800817	0.778584
CTBS+IGHV5-10-1;IGHV5-51+IGHV1-46	CTBS	0.0635341	1.85544	0.800817	0.744102
CTBS+IGHV5-10-1;IGHV5-51+IGHV1-46	IGHV5-10-1;IGHV5-51	0.187104	1.3192	0.800817	0.764065
CTBS+IGHV5-10-1;IGHV5-51+IGHV1-46	IGHV1-18	0.338266	-0.957598	0.800817	0.83167
CTBS+IGHV5-10-1;IGHV5-51+IGHV1-46	IGHV1-46	0.182201	1.33401	0.800817	0.767241
CTBS+IGHV5-10-1;IGHV5-51+IGHV1-46	MPO	0.436928	0.777391	0.800817	0.763158
CA1+CTBS+IGHV5-10-1;IGHV5-51	CA1	0.0893087	1.69906	0.791289	0.733666
CA1+CTBS+IGHV5-10-1;IGHV5-51	IGHV2-26	0.741877	0.329369	0.791289	0.778584
CA1+CTBS+IGHV5-10-1;IGHV5-51	CTBS	0.121432	1.54879	0.791289	0.744102
CA1+CTBS+IGHV5-10-1;IGHV5-51	IGHV5-10-1;IGHV5-51	0.297212	1.04243	0.791289	0.764065
CA1+CTBS+IGHV5-10-1;IGHV5-51	IGHV1-18	0.294484	-1.04834	0.791289	0.83167
CA1+CTBS+IGHV5-10-1;IGHV5-51	IGHV1-46	0.571277	0.566172	0.791289	0.767241
CA1+CTBS+IGHV5-10-1;IGHV5-51	MPO	0.578548	0.555507	0.791289	0.763158
